# Supplementary material for: Multi-atom pattern analysis for binary superlattices
Source: Royal Society of Chemistry journal article supplement (doi:10.1039/c7sm01642e), 2017-01-01
Supplement: c7sm01642e1.pdf [file c7sm01642e1.pdf]

**Supplementary information for “Multi-atom pattern analysis for binary superlattices”**

Wesley F. Reinhart and Athanassios Z. Panagiotopoulos

*Department of Chemical and Biological Engineering, Princeton University,  
Princeton, NJ 08544, USA*

(Dated: 15 August 2017)

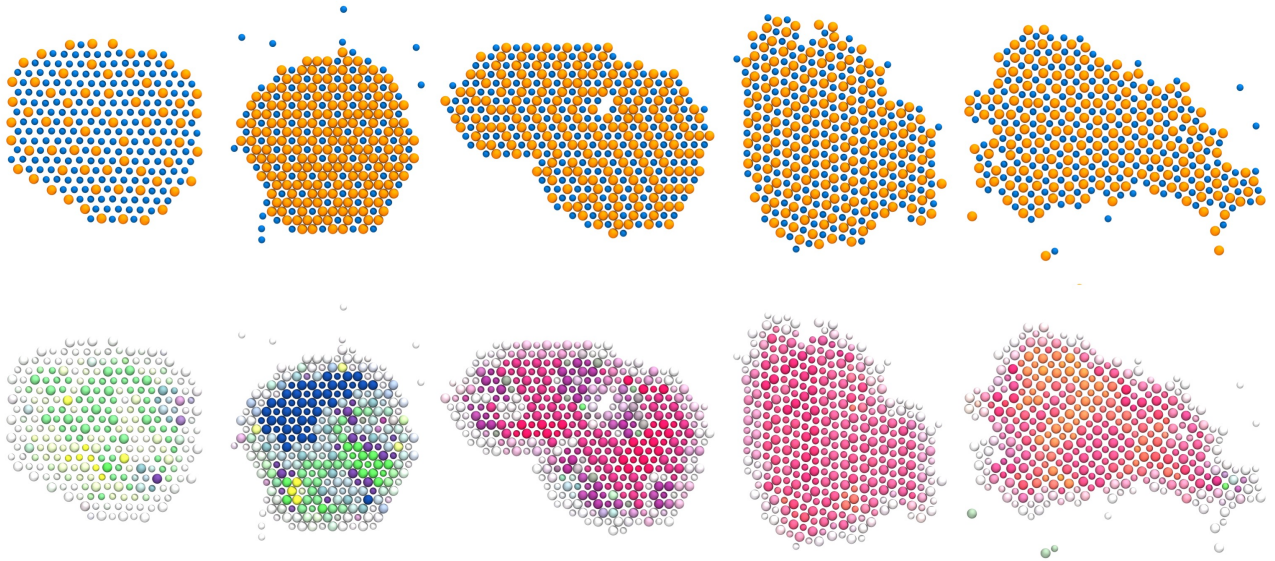

FIG. S1: Snapshots with 1:3 (rightmost two frames) and 1:1 (leftmost three frames) stoichiometry and varying interaction potentials. First frame from Mahynski et al. (ref. 6), others from Song et al. (ref. 7). Color scheme is the same as Fig. 4 in the main text.

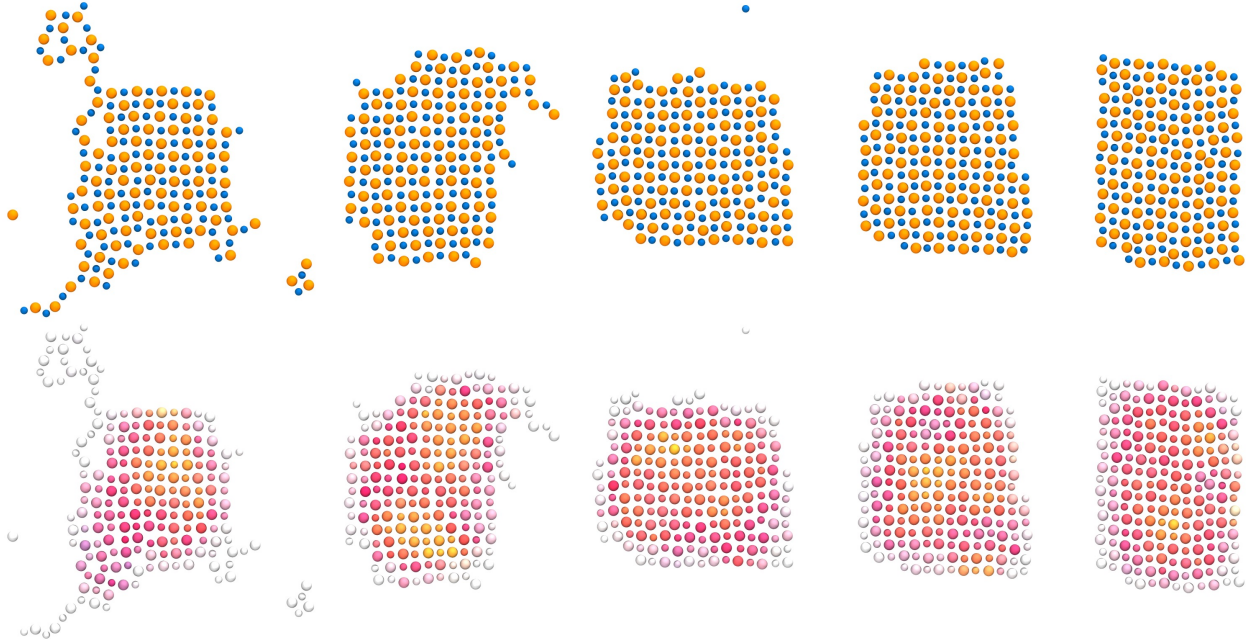

FIG. S2: Snapshots from Mahynski et al. (ref. 6) with 1:1 stoichiometry and  $\lambda < 0$ . Color scheme is the same as Fig. 4 in the main text.

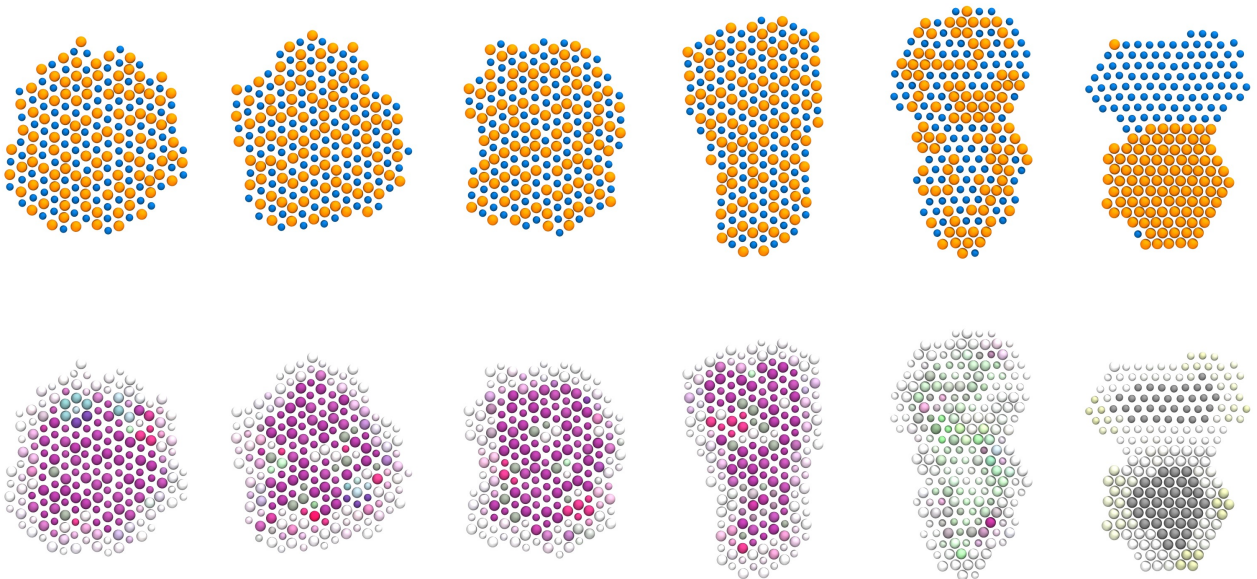

FIG. S3: Snapshots from Mahynski et al. (ref. 6) with 1:1 stoichiometry and  $\lambda \geq 0$ . Color scheme is the same as Fig. 4 in the main text.
